# Supplementary material for: Enhanced photocatalytic degradation of Congo red by a BiVO4/ZnIn2S4 composite: performance and mechanism
Source: Royal Society of Chemistry journal article supplement (doi:10.1039/d6ra00765a), 2026-04-27
Supplement: d6ra00765a1.pdf [file d6ra00765a1.pdf]

## Supplementary information

### Application of BiVO<sub>4</sub>/ZnIn<sub>2</sub>S<sub>4</sub> composite to photocatalytic degrade Congo red

Xinyue Liu<sup>1,2</sup>, Yixin Zhang<sup>2</sup>, Jiaying Yu<sup>2</sup>, Ming Li<sup>2\*</sup>

<sup>1</sup>Nanjing-Helsinki Institute in Atmospheric and Earth System Sciences, Nanjing  
University, Suzhou 215163, China

<sup>2</sup>College of Forestry, Northeast Forestry University, Harbin 150040, China

**\*Corresponding author:** Prof. Ming Li

College of Forestry, Northeast Forestry University, Harbin 150040, China

**Tel:** 86-451-82192120

**E-mail:** [liming1986@nefu.edu.cn](mailto:liming1986@nefu.edu.cn) (M. Li)

Table S1 Specific surface area, pore size, and pore volume of BiVO<sub>4</sub>, ZnIn<sub>2</sub>S<sub>4</sub>, and BiVO<sub>4</sub>/ZnIn<sub>2</sub>S<sub>4</sub>

| Catalyst                                            | S <sub>BET</sub> (m <sup>2</sup> /g) | Pore size (nm) | Pore volume (cm <sup>3</sup> /g) |
|-----------------------------------------------------|--------------------------------------|----------------|----------------------------------|
| BiVO <sub>4</sub>                                   | 3.583                                | 11.77          | 0.01055                          |
| ZnIn <sub>2</sub> S <sub>4</sub>                    | 55.75                                | 14.24          | 0.2199                           |
| BiVO <sub>4</sub> /ZnIn <sub>2</sub> S <sub>4</sub> | 61.75                                | 15.28          | 0.2129                           |

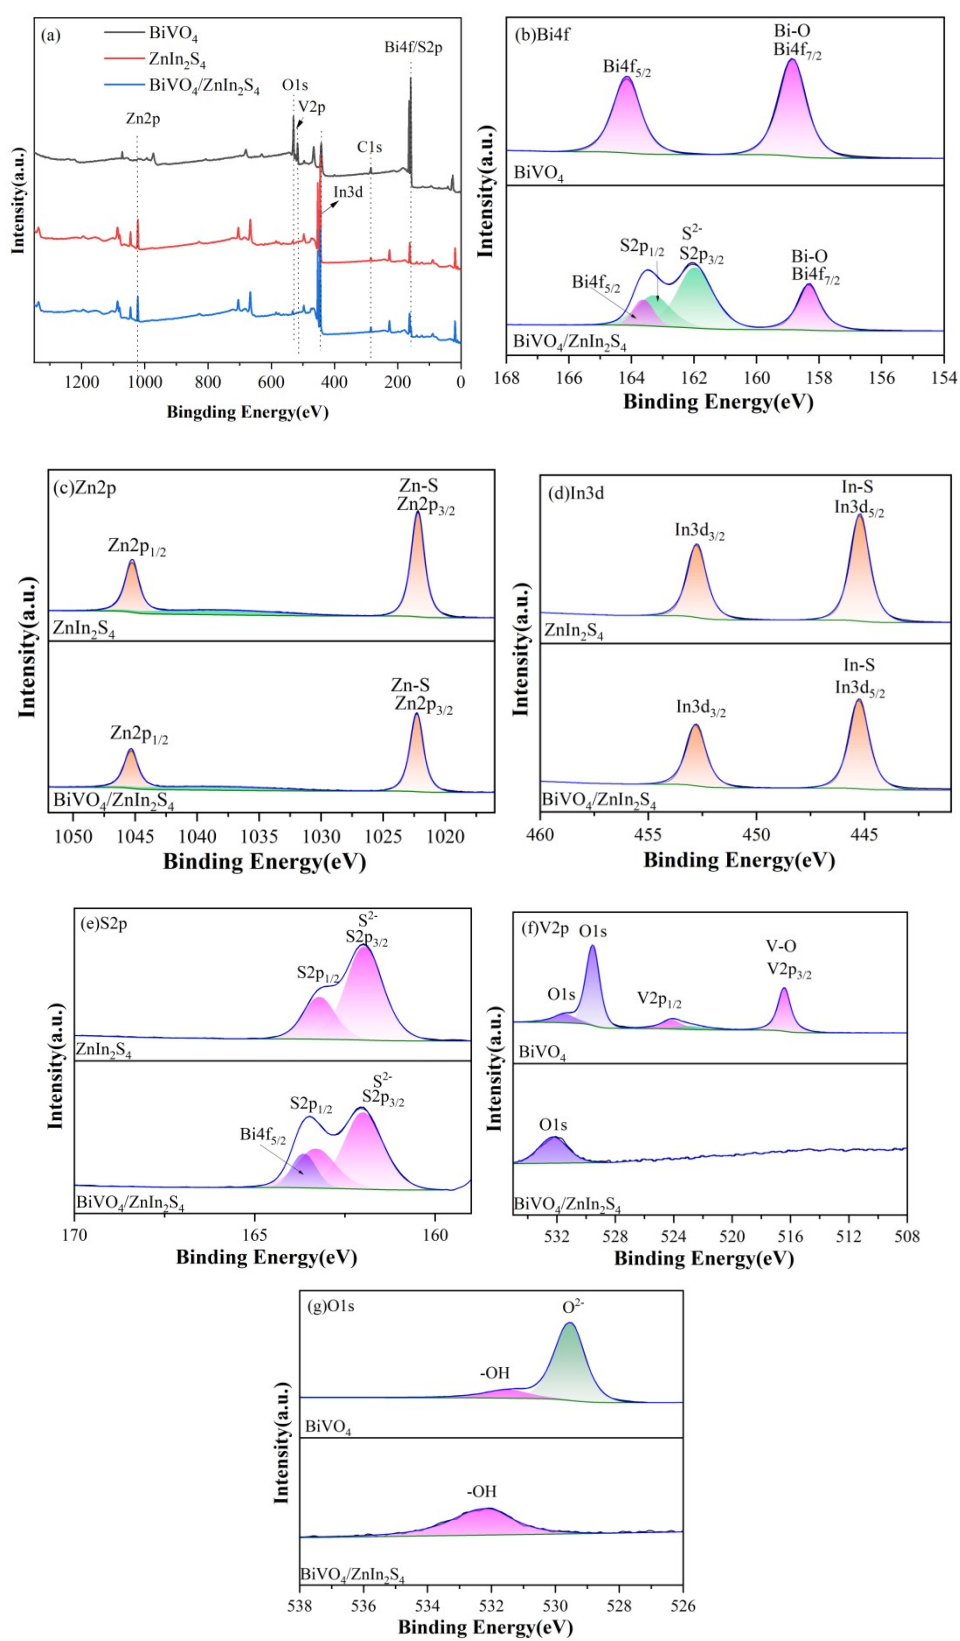

Fig. S1 XPS spectra of BiVO<sub>4</sub> and BiVO<sub>4</sub>/ZnIn<sub>2</sub>S<sub>4</sub>: Full spectrum (a), Bi 4f (b), Zn 2p (c), In 3d (d), S 2p (e), V 2p (f), O 1s (g).

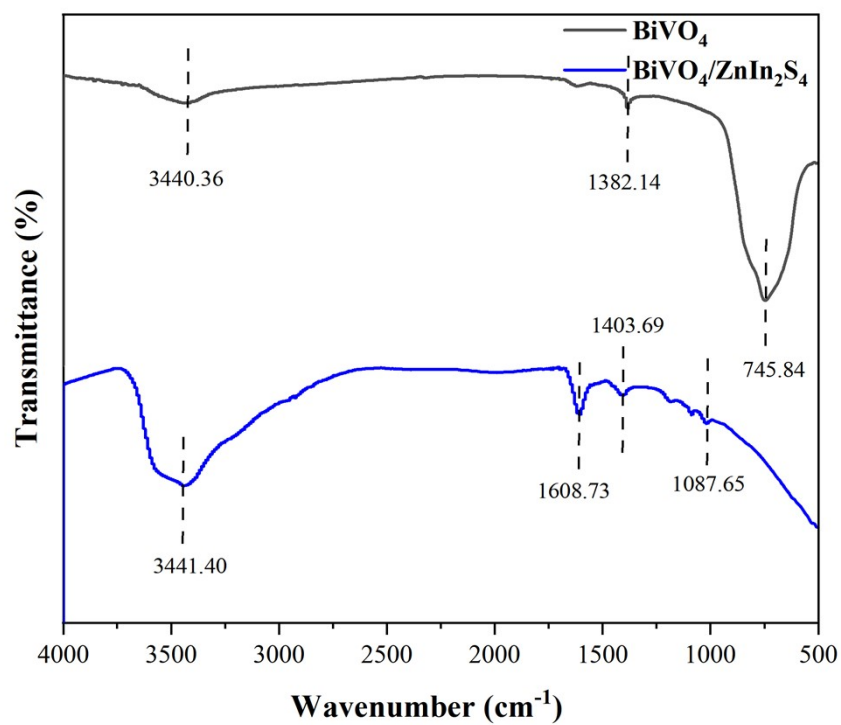

Fig. S2 FT-IR spectra of  $\text{BiVO}_4$  and  $\text{BiVO}_4/\text{ZnIn}_2\text{S}_4$

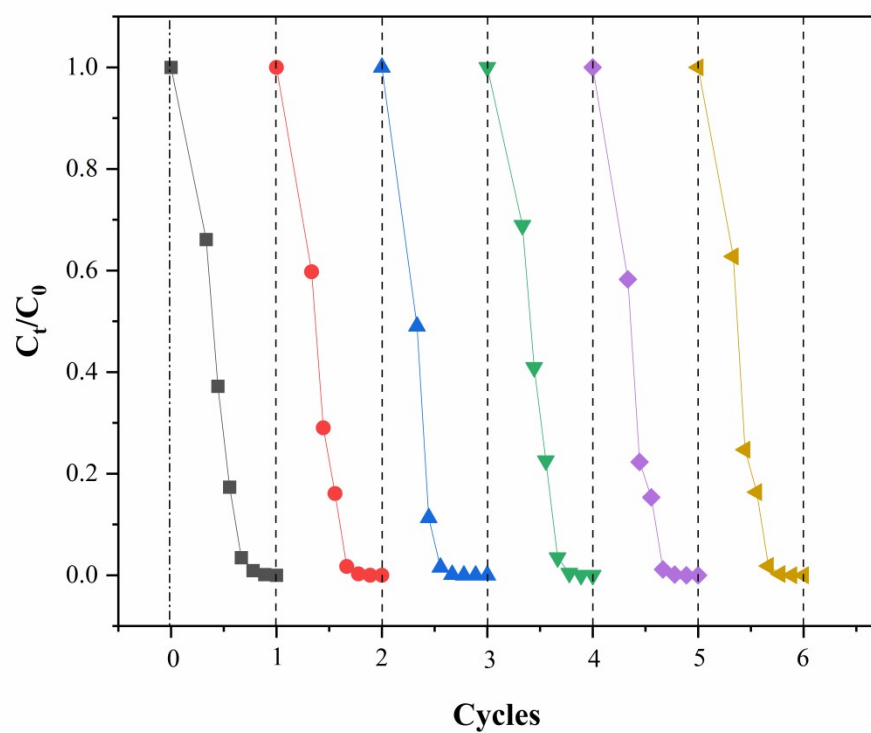

Fig. S3 Degradation efficiency of BiVO<sub>4</sub>/ZnIn<sub>2</sub>S<sub>4</sub> during six cycles

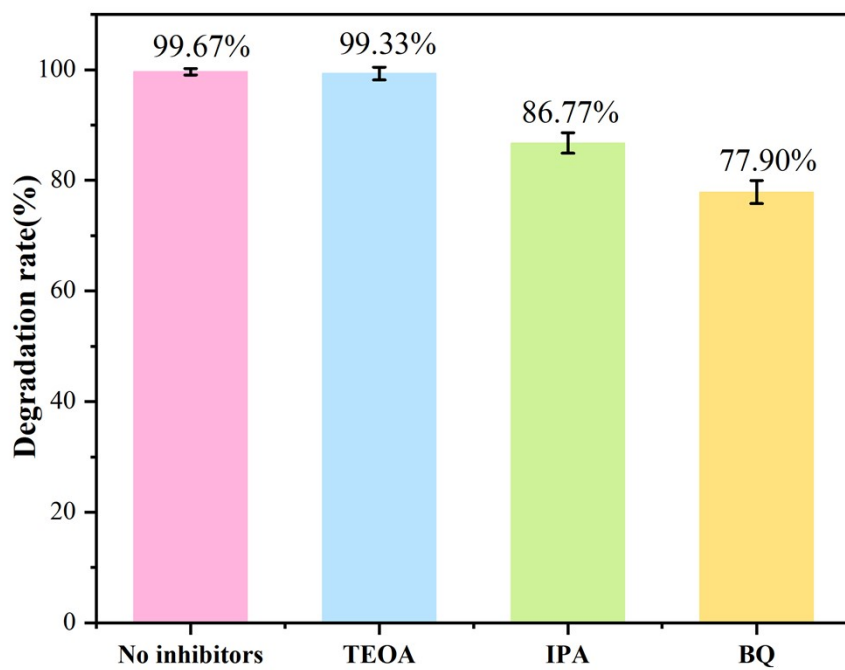

Fig. S4 Influence of scavengers on photocatalytic degradation rate of CR by 7% BiVO<sub>4</sub>/ZnIn<sub>2</sub>S<sub>4</sub>

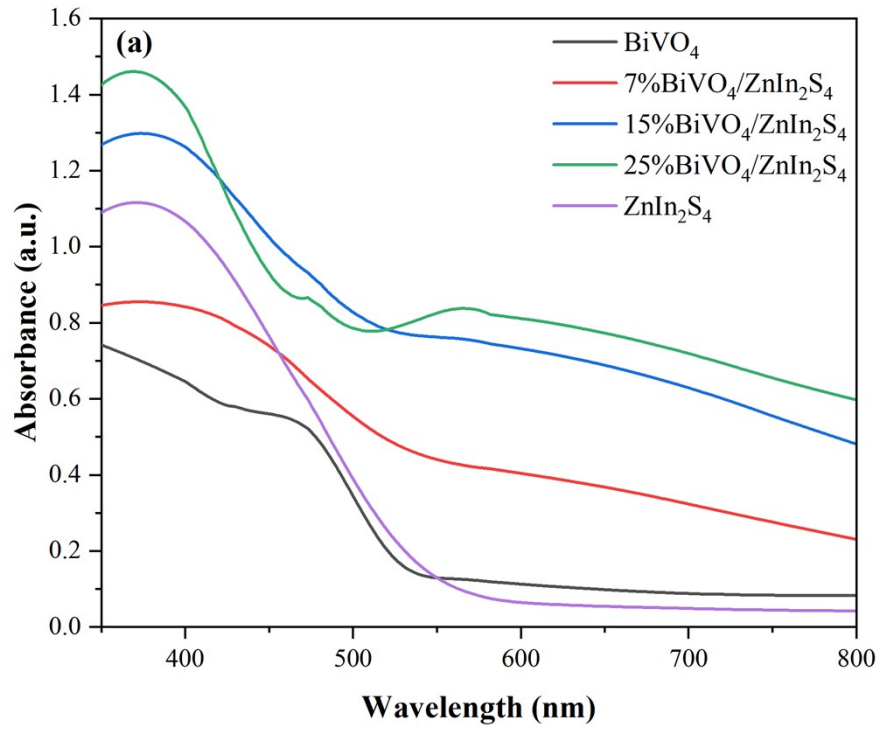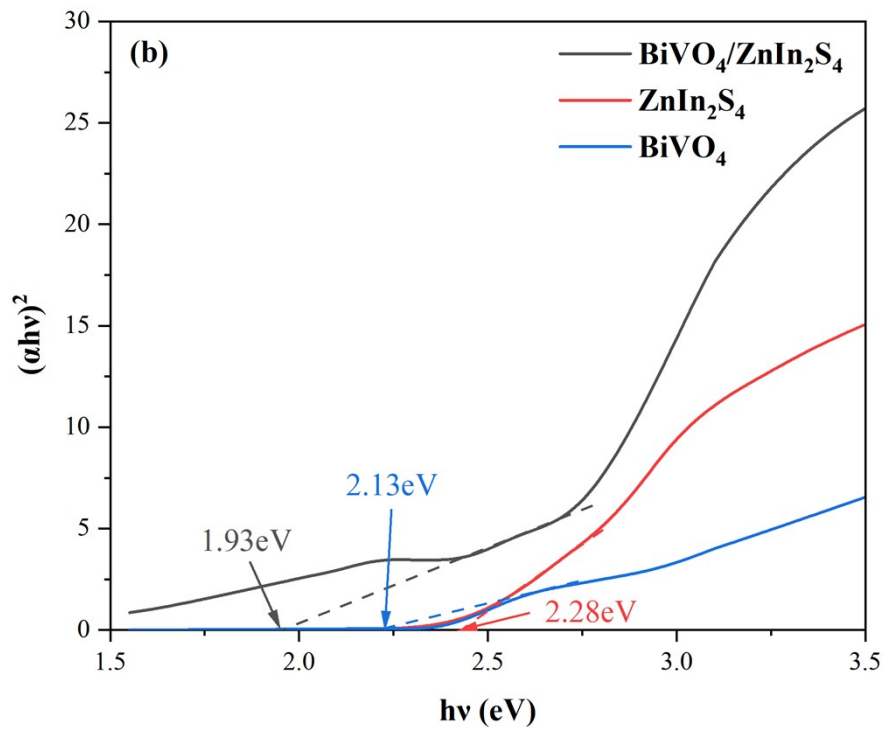

Fig. S5 Diffuse reflectance UV-vis spectra of samples (a), Plots of  $(\alpha h\nu)^2$  versus the photon energy ( $h\nu$ ) of  $\text{ZnIn}_2\text{S}_4$  and  $\text{BiVO}_4$  with the corresponding  $E_g$  (b)
